# Supplementary material for: mTOR-dependent translation drives tumor infiltrating CD8+ effector and CD4+ Treg cells expansion
Source: eLife. 2021 Nov 17;10:e69015. doi: 10.7554/eLife.69015 (PMC8598161; doi:10.7554/eLife.69015)
Supplement: Figure 1—source data 3. [file elife-69015-fig1-data3.csv]

Number of families	1
Number of comparisons per family	3
Alpha	0,05
Dunnett's multiple comparisons test	Mean Diff.	95.00% CI of diff.	Significant?	Summary	Adjusted P Value	A-?
Ctrl vs. 1	15,83	15.37 to 16.29	Yes	****	<0.0001	B	1
Ctrl vs. 4	8,487	8.024 to 8.950	Yes	****	<0.0001	C	4
Ctrl vs. 20	16,84	16.38 to 17.31	Yes	****	<0.0001	D	20
Test details	Mean 1	Mean 2	Mean Diff.	SE of diff.	n1	n2	q	DF
Ctrl vs. 1	22,44	6,615	15,83	0,1607	3	3	98,49	8
Ctrl vs. 4	22,44	13,96	8,487	0,1607	3	3	52,81	8
Ctrl vs. 20	22,44	5,601	16,84	0,1607	3	3	104,8	8
