# Supplementary material for: mTOR-dependent translation drives tumor infiltrating CD8+ effector and CD4+ Treg cells expansion
Source: eLife. 2021 Nov 17;10:e69015. doi: 10.7554/eLife.69015 (PMC8598161; doi:10.7554/eLife.69015)
Supplement: Figure 1—source data 4. [file elife-69015-fig1-data4.xlsx]

## Sheet: Figure 1G
	cd4
					AVG
P-eIF2 normoxia		0.074	0.07	0.078	0.074					AVG
P-eIf2 Hypoxia		0.098	0.095	0.132	0.108333			Background
							0.051	0.059	0.053	0.0543333
BG subtraction
P-eIF2 normoxia		0.074	0.07	0.078	0.074
P-eIf2 Hypoxia		0.098	0.095	0.132	0.108333
				T-test	0.0365999
