# Supplementary material for: mTOR-dependent translation drives tumor infiltrating CD8+ effector and CD4+ Treg cells expansion
Source: eLife. 2021 Nov 17;10:e69015. doi: 10.7554/eLife.69015 (PMC8598161; doi:10.7554/eLife.69015)
Supplement: Figure 2—figure supplement 2—source data 1. [file elife-69015-fig2-figsupp2-data1.xlsx]

## Sheet: Figure 2 - figure supplement 2B
	% of p-S6(Ser240/244)+ in CD4+ TILs Puromycin+ and Puromycin-
		%of Puro-	% of Puro+
		46.5	85.4
		41.9	98.8
		36	85.7
		55.5	86
		43.9	89.4
		52.6	85.5
		61.8	97.9
		61.9	94.1
		48.3	82.4
		67.2	97.4
	ST DEV	10.0184	6.18927
	AVERAGE	51.56	90.26
	P.VALUE	<0.0001

## Sheet: Figure 2 - figure supplement 2C
	% of p-S6(Ser240/244)+ in CD8+ TILs Puromycin+ and Puromycin-
		%of Puro-	% of Puro+
		56.6	87.6
		29.6	80.4
		55.4	93.5
		63.9	94
		64.4	94.5
		77.1	92.9
		70.9	94.2
		86.2	98.1
		60.6	93
		92.9	98.8
	ST DEV	17.7642	5.28751
	AVERAGE	65.76	92.7
	P.VALUE	<0.0001

## Sheet: Figure 2 - figure supplement 2D
		pEIF4e incorporation in Puro+ or Puro- CD4+ TILs
			%of EIF4e+ cells
			Puromycin-	Puromycin+
			0.52	1.8
			0.31	0
			0.54	2.75
			0.78	3.07
			0.81	2.47
			0.39	2.29
			1.49	2.8
			0.81	2.23
		ST DEV	0.963386	0.370441
		AVERAGE	2.17625	0.70625
		P VALUE	0.0093

## Sheet: Figure 2 - figure supplement 2E
		% of p-S6+ cells in TILs
		No Everolimus	With Everolimus
		59.5	49.5
		62.9	40.3
		60.8	43.5
		60.4	55.9
		57.6	55.5
		65.3	45.7
	ST DEV	2.69326	6.39969
	AVERAGE	61.0833	48.4
	P.VALUE	0.0022
