# Supplementary material for: mTOR-dependent translation drives tumor infiltrating CD8+ effector and CD4+ Treg cells expansion
Source: eLife. 2021 Nov 17;10:e69015. doi: 10.7554/eLife.69015 (PMC8598161; doi:10.7554/eLife.69015)
Supplement: Figure 2—source data 1. [file elife-69015-fig2-data1.xlsx]

## Sheet: Figure 2B
				Puromycin incorporation in CD4+ T cells
		SPLEEN			TUMOR
		%of Puro-	% of Puro+		%of Puro-	% of Puro+
		90.7	9.89		63.9	36.7
		93.3	7.06		80.9	19.4
		91.1	9.43		82.3	18
		84.4	17		75	25
		92.3	8		76.8	23.2
		93.7	6.6		61.9	38.1
		85.2	16.4		80.2	19.8
		85.4	16.5		69.2	30.8
		87.4	13.9		67.7	32.3
		69.3	33.3		82.3	17.7
		90.3	11.3		52.6	47.4
		78.5	23.5		60.8	39.2
		73	27		51.8	49
		70	30		75.1	26
		65	35		50.9	50.1
		88	12		42.8	58.3
		70	30		70.3	30.7
					46.4	54.7
					51	50.1
	ST DEV	9.71931	9.72967	ST DEV	13.0475	13.319
	AVERAGE	82.8	18.0518	AVERAGE	65.3632	35.0789
	P.VALUE	<0.0001		P.VALUE	<0.0001

## Sheet: Figure 2C
				Puromycin incorporation in CD8+ T cells
		SPLEEN			TUMOR
		%of Puro-	% of Puro+		%of Puro-	% of Puro+
		55.37	78.12		57	43
		51.55	74.34		68	32
		50.24	76.88		28	72
		52.18	74.44		54	46
		52.09	73.01		68	32
		45.77	72.79		76	24
		41.57	72.66		69	31
		52.31	77.07		77	23
		46.83			81	19
					66	34
					17	83
					81	19
					69	31
					78	22
					80	30
					56	44
					68	32
					52	48
					18.5	81.5
					69.7	30.3
					38.6	61.4
					11.9	88.1
	ST DEV	4.24669	2.15682	ST DEV	21.8948	21.5246
	AVERAGE	49.7678	74.9137	AVERAGE	58.35	42.1045
	P.VALUE	<0.0001		P.VALUE	0.0485

## Sheet: Figure 2E
		% of pS6 in CD4+ T cells Puromycin+ and Puromycin-
			%of Puro-	% of Puro+
			33.3	64.5
			29.1	67.5
			15.7	82.1
			3.61	88.1
			39.8	58.3
			30.5	66.7
			27.7	68.9
			36.2	62.3
			22.6	75.6
			30.2	68
		ST DEV	10.5911	9.15156
		AVERAGE	26.871	70.2
		P.VALUE	<0.0001

## Sheet: Figure 2F
		% of pS6 in Puro- of Puro+ CD8+ TILs
			Puro-	Puro+
			14.6	85.3
			7.76	63.2
			6.09	68.9
			4.79	93.5
			10.6	72.1
			10.7	72.9
			30	79.2
			16.6	83.6
			15	76.3
			20.1	83.5
		ST DEV	7.5181	8.95622
		AVERAGE	13.624	77.85
		P VALUE	<0.0001

## Sheet: Figure 2H
		% of Puromycin+ cells in Tumor cells
		CD4			CD8
		No Everolimus	With Everolimus		No Everolimus	With Everolimus
		25.9	0.12		17.9	0.14
		17.6	10.6		18.49	3.98
		28.7	10.2		15.6	7.18
		24.3	18.9		17.4	8.06
		25	7.8		31.1	9.34
		18.3	27.3		20.9	22.3
		33.9	17		21.8	15.6
		58.1	0.48		53	0.46
		25.1	0.74		16.1	0.36
		43.9	21.9		35.8	15.9
	ST DEV	12.4214	9.57846	ST DEV	11.9381	7.59525
	AVERAGE	30.08	11.504	AVERAGE	24.809	8.332
	P.VALUE	0.0015		P.VALUE	0.0008
