# Supplementary material for: mTOR-dependent translation drives tumor infiltrating CD8+ effector and CD4+ Treg cells expansion
Source: eLife. 2021 Nov 17;10:e69015. doi: 10.7554/eLife.69015 (PMC8598161; doi:10.7554/eLife.69015)
Supplement: Figure 3—source data 1. [file elife-69015-fig3-data1.xlsx]

## Sheet: Figure 3C
		% of PMO in CD4+ T cells Puromycin+ and Puromycin-
			%of Puro-	% of Puro+
			5.31	3.7
			10.3	7.91
			6.2	4.13
			4.65	2.7
			5.24	1.84
			11.6	3.04
			5.71	2.21
			3.02	2.28
			8.01	5.34
			5.46	2.6
			2.25	1.26
			4.07	1.63
			4.69	1.18
			3.16	2.33
		ST DEV	2.66447	1.81351
		AVERAGE	5.69071	3.01071
		P VALUE	0.0017

## Sheet: Figure 3D
		% of PMO in CD8+ T cells Puromycin+ and Puromycin-
			%of Puro-	% of Puro+
			16.4	5.67
			6.47	4.6
			7.09	4.84
			10.5	3.72
			4.07	1.63
			4.69	1.18
			3.16	2.33
			8.96	6.92
			14	11
			14.9	1.94
			5.28	2.3
			6.6	3.8
			16.3	6.64
			12	1.82
		ST DEV	4.67687	2.72178
		AVERAGE	9.31571	4.17071
		P VALUE	0.0008
