# Supplementary material for: mTOR-dependent translation drives tumor infiltrating CD8+ effector and CD4+ Treg cells expansion
Source: eLife. 2021 Nov 17;10:e69015. doi: 10.7554/eLife.69015 (PMC8598161; doi:10.7554/eLife.69015)
Supplement: Figure 4—figure supplement 1—source data 1. [file elife-69015-fig4-figsupp1-data1.xlsx]

## Sheet: Figure 4 - figure supplement 1A
% of PD-1+ in CD8+Puromycin+ TILs Ki-67+ and Ki-67- cells
	%of Ki-67-	% of Ki-67+
	11.5	58.6
	3.45	42.3
	10.7	55.6
	14.3	58.7
	9.3	46.4
	3.6	38
	5.5	49.1
	2.58	35.6
	16	51.2
	11.1	59
ST DEV	4.75828	8.72318
AVERAGE	8.803	49.45
P.VALUE	<0.0001

## Sheet: Figure 4 - figure supplement 1B
	% of Tim-3+ in CD8+Puromycin+ TILs Ki-67+ and Ki-67- cells
		%of Ki-67-	% of Ki-67+
		16	56.7
		13.8	40.4
		24	48.4
		23	61.3
		16.7	48.1
		12.9	35.3
		14.4	51
		6.94	31.4
		17.8	42.8
		20.4	50.3
	ST DEV	5.07341	9.23905
	AVERAGE	16.594	46.57
	P.VALUE	<0.0001
