# Supplementary material for: mTOR-dependent translation drives tumor infiltrating CD8+ effector and CD4+ Treg cells expansion
Source: eLife. 2021 Nov 17;10:e69015. doi: 10.7554/eLife.69015 (PMC8598161; doi:10.7554/eLife.69015)
Supplement: Figure 4—source data 1. [file elife-69015-fig4-data1.xlsx]

## Sheet: Figure 4B
		Puromycin incorporation in CD44- and CD44+ CD8+ TILs
			%of Puro+ cells
			CD44- cells	CD44+ cells
			12.1	29
			38.9	72.7
			8.47	17.6
			28.7	43.9
			69.7	61.7
			31.6	45
			26	41
			10.4	25.4
			18.3	19.5
			15	21.3
			7.39	39.5
			37.5	90.6
			14.3	25.7
			11.2	21.6
			20.9	39.3
			7.57	17.2
			25.1	48.2
			16.1	25.2
		ST DEV	15.4828	20.3312
		AVERAGE	22.1794	38.0222
		P VALUE	0.0026

## Sheet: Figure 4D
		Markers in gated Puro- and Puro+ CD8+ TILs
		PD-1		TIGIT		TIM-3		CTLA-4		SLAMF6		CD39		CD27		ICOS		CD28		CD69		CCR5		CD103		IFN-γ		Granzyme B		TNF-α
		Puro-	Puro+	Puro-	Puro+	Puro-	Puro+	Puro-	Puro+	Puro-	Puro+	Puro-	Puro+	Puro-	Puro+	Puro-	Puro+	Puro-	Puro+	Puro-	Puro+	Puro-	Puro+	Puro-	Puro+	Puro-	Puro+	Puro-	Puro+	Puro-	Puro+
		70.1	41.9	44	42.8	65	73.3	4.02	3.02	28.9	42.3	63.2	80.3	37.8	51.5	8.07	3.35	60.5	67.9	2.66	4.52	2	5.2	4.95	4.58	45.4	54.4	25.2	44	15.5	11.4
		39.5	50.4	33.2	26.7	31.2	46.5	4.59	1.28	34.6	54.1	67	48.4	28.7	43.6	8.48	3.5	31.6	35.3	2.85	4.45	0.78	1.19	6.67	5.72	51.7	60	10.4	15.6	4.16	9.09
		13.2	21.1	32.9	12.4	8.47	28.2	3.31	2.15	22.53	50.9	59.5	58.4	8.12	30.7	9.52	2.78	19.6	17.4	3.76	6.65	0.4	1.08	9.01	10.8	24.5	59	13.52	37.38	5.19	14.1
		31.8	53.1	24.7	16.3	10.4	51.6	1.98	2.21	18.1	40.9	46	62	14.5	43.2	7.06	2.71	24.8	29	11.1	16.3	0.92	0.68	10.2	16.3	39.4	52	44	26.9	17	13.3
		21.2	33.7	32.3	26.1	17.3	31.5	2.45	1.51	37	49.1	32.9	62.8	17.3	39	10.6	7.47	30.2	36.8	5.13	7.76	1.1	0.59	7.19	7.84	33	41.7	21.5	25.1	5.22	9.64
		35.8	53.8	25.4	17.1	31.9	54.7	1.58	3.73	45.7	61.7	21.8	61	22.1	44.9	8.2	2.37	22.8	23.4	4.65	6.76	0.44	0.18	5.6	4.47	31.2	39.5	19.54	26.6	4.28	8.35
		29.5	43.6	25.6	32.7	24.3	49.4	2.41	2.82	39.8	51.4	34.2	69.8	23.9	45.1	24.6	3.03	50.8	47.2	3.58	4.57	2.62	4.4	17.8	7.58	34.7	57.8	23.67	39.08	7.1	8.91
		31.1	50	46.1	27.5	26.5	50.3	2.05	1.51	24.3	46.9	29.5	69.2	18.4	45.8	26.7	11.9	38.7	52.6	9.25	5.38	0.76	1.22	4.14	4.32	29.61	45.1	10.6	22.6	8.79	9.8
		34.8	45.6	41.9	32.4	25.5	58.1	1.76	2.14	29.9	49.9	31.2	71.4	14.8	44	20.5	5.42	47.8	56.4	4.11	6.67	0.67	1.25	6.02	6.23	18.51	33.8	11.8	37	11.9	13.4
		49	40.3			37.9	59.6					13.2	71.7	31.1	48.9					4.97	6.04			3.73	3.76	30.2	45.5	11.8	25.1	9.15	12
																										17.52	32.3
																										46.17	65.8
																										14.51	29.05
	ST DEV	15.516	10.0161	8.25052	9.5466	16.0558	13.1423	1.05532	0.803617	8.8796	6.20613	18.2711	8.86366	8.91739	5.64822	7.86127	3.14548	14.0827	16.5591	2.77754	3.48615	0.748031	1.77389	4.13979	3.85695	11.5285	11.7746	10.3795	8.90181	4.62545	2.11209
	AVERAGE	35.6	43.35	34.0111	26	27.847	50.32	2.68333	2.26333	31.2033	49.6889	39.85	65.5	21.672	43.67	13.7478	4.72556	36.3111	40.6667	5.206	6.91	1.07667	1.75444	7.531	7.16	32.0323	47.3808	19.203	29.936	8.829	10.999
	P VALUE	0.0753		0.1615		0.0052		0.4219		0.0002		0.0029		<0.0001		0.1615		0.6665		0.0892		0.4363		0.9118		0.0051		0.0123		0.1431

## Sheet: Figure 4C
	% of Ki-67+ in CD8+ TILs Puromycin+ and Puromycin-
		%of Puro-	% of Puro+
		60.6	21
		65	12.4
		67.7	15.1
		71.3	12.9
		65.2	14.6
		52.1	15.8
		64.6	14.8
		47.1	16.8
		67.6	10.8
		86.4	17.2
	ST DEV	10.6328	2.85859
	AVERAGE	64.76	15.14
	P.VALUE	<0.0001

## Sheet: Figure 4E
	% of Tim-3+Slamf6- in CD8+ TILs Puromycin+ and Puromycin-
		%of Puro-	% of Puro+
		42.7	42.9
		19.7	25
		5.14	6.87
		11.4	19.3
		14.5	23.2
		20.1	32.1
		11.4	20.5
		16.9	30.6
		16.3	30.4
		24.7	33.1
	ST DEV	10.1671	9.78724
	AVERAGE	18.284	26.397
	P.VALUE	0.0341

## Sheet: Figure 4F
	% of Tim-3+PD1+ in CD8+ TILs Puromycin+ and Puromycin-
		%of Puro-	% of Puro+
		59	64.4
		26	39.7
		3.53	11.1
		6.48	34.8
		8.54	18.3
		23.8	43.1
		19.9	35.7
		17.5	40.1
		20.6	54.7
		34.1	50.8
	ST DEV	16.0708	15.9308
	AVERAGE	21.945	39.27
	P.VALUE	0.0232
