# Supplementary material for: mTOR-dependent translation drives tumor infiltrating CD8+ effector and CD4+ Treg cells expansion
Source: eLife. 2021 Nov 17;10:e69015. doi: 10.7554/eLife.69015 (PMC8598161; doi:10.7554/eLife.69015)
Supplement: Figure 5—figure supplement 1—source data 1. [file elife-69015-fig5-figsupp1-data1.xlsx]

## Sheet: Figure 5 -figure supplement 1A 
		% of Ki67 in Puro- of Puro+ CD4+ TILs
			Puro-	Puro+
			14.6	37.8
			19.1	55.4
			21.2	55.9
			24.1	68
			24.4	57.6
			17.9	55
			16.5	43
			25.4	68.4
			22.2	52.8
		ST DEV	3.79144	10.0052
		AVERAGE	20.6	54.8778
		P VALUE	0.0006

## Sheet: Figure 5 - figure supplement 1B
	% of p-S6(Ser240/244)+ in Treg+ cells Puromycin+ and Puromycin-
		%of Puro-	% of Puro+
		31.5	71.4
		27.6	66.7
		47.8	90.9
		37.7	80.9
		47.4	90.4
		40	68.8
		54.1	82.1
		76.7	97
		45.6	87.1
		73.4	98.5
	ST DEV	16.2289	11.4304
	AVERAGE	48.18	83.38
	P.VALUE	0.0003
