# Supplementary material for: mTOR-dependent translation drives tumor infiltrating CD8+ effector and CD4+ Treg cells expansion
Source: eLife. 2021 Nov 17;10:e69015. doi: 10.7554/eLife.69015 (PMC8598161; doi:10.7554/eLife.69015)
Supplement: Figure 5—source data 1. [file elife-69015-fig5-data1.xlsx]

## Sheet: Figure 5B
		Puromycin incorporation in CD44- and CD44+ CD4+ TILs
			%of Puro+ cells
			CD44- cells	CD44+ cells
			8.56	16.1
			10.1	44.6
			12.86	21.9
			21.5	36.1
			57	72.1
			20	34.2
			40.6	68.5
			27.8	44.1
			43.4	55
			50.8	65.4
			12.1	16.3
			18.8	29.7
			13	66.7
			34.1	34.3
			1.22	8.56
			11.9	35.6
			8.35	19.1
		ST DEV	16.467	20.2302
		AVERAGE	23.0641	39.3094
		P VALUE	0.012

## Sheet: Figure 5C
		Markers in gated Puro- and Puro+ CD4+ TILs
		PD-1		TIGIT		TIM-3		CTLA-4		SLAMF6		CD39		CD27		ICOS		CD28		CD69		CCR5		CD103
		Puro-	Puro+	Puro-	Puro+	Puro-	Puro+	Puro-	Puro+	Puro-	Puro+	Puro-	Puro+	Puro-	Puro+	Puro-	Puro+	Puro-	Puro+	Puro-	Puro+	Puro-	Puro+	Puro-	Puro+
		35.9	34	21.6	23	39	38.9	13.4	21.8	64.5	86.6	26	56.7	15.7	32	38.5	26.3	40.1	30.9	26	20	8.36	9.7	10.5	15.4
		27.6	26.2	26.9	27.9	47.3	50.3	9.89	16.1	61.6	73.6	23.6	34	21.5	28	41	29.7	41.6	36.9	23.6	23	1.86	6.08	15.6	23
		37.4	43.2	27.3	28.3	86.1	48.6	11.3	21.8	42.3	64	21.6	56.6	21.3	36	40.5	30	45.3	30.9	21.6	14.1	1.15	4.35	23.3	18.4
		51.7	50.1	20.4	23.3	21.1	26.2	9.15	13.9	55.63	74.2	9.55	45.1	23.3	27.8	33	24.1	40.1	29.1	19.55	17	4.78	7.4	17.09	23.3
		31.2	13.1	33.4	43.2	46.9	52.5	12.2	17.7	46	48.8	24.2	36.6	9.81	20.7	51.9	53.8	48.7	56.1	24.2	29.4	1.48	6.17	14.5	21.6
		35.2	36.4	14.3	17.2	30.2	25.2	5.59	9.38	65.1	76.9	30.8	48	19.3	31.9	18.6	19.4	29.1	27.6	30.8	25.6	2.03	5.99	14.7	22.1
		28.5	24.6	43.9	36.8	85	66.4	15.5	13	24.5	57.5	14.4	30.9	13.2	17.6	42.8	37.5	45.2	45.6	14.4	17.2	1.22	4.23	18.15	12.7
		75.3	62.4	33.9	27.7	63.8	48.5	10	13.5	19.7	56.1	23.8	38.6	18.1	34.7	54.4	37.9	55.6	46.4	23.8	38.6	1.42	9.14	11.5	18.9
		58.2	37.5	33.5	27.5	64.4	54.8	7.39	13.9	39.7	73.2	19.5	50.9	10.5	24.7	50	30	46.6	33.4	29.5	15.8	1.29	4.18	20.9	21.6
		60.5	39.5									21.9	43.5	17.7	35.5					21.9	30	1.35	4.98	11.8	19.4
	ST DEV	16.2354	13.7912	8.90226	7.67883	22.8151	13.4243	3.02415	4.14015	16.7618	12.0332	5.97309	9.07113	4.66046	6.33166	10.9233	10.0449	7.27332	9.76985	4.72229	7.81538	2.32433	1.97935	4.14952	3.44325
	AVERAGE	44.15	36.7	28.3556	28.3222	53.7556	45.7111	10.4911	15.6756	46.5589	67.8778	21.535	44.09	17.041	28.89	41.1889	32.0778	43.5889	37.4333	23.535	23.07	2.494	6.222	15.804	19.64
	P VALUE	0.5288		0.8633		0.9118		0.0071		0.0106		<0.0001		0.0011		0.0475		0.1973		0.6305		0.0021		0.0375

## Sheet: Figure 5F
	% of pS6 in Puro- and Puro+ Tregs in tumor
		Puro-	Puro+
		34.2	82.4
		21.2	65.3
		23.5	68.8
		15.9	77.5
		20.6	65.4
		25	58.3
		15.7	69.1
	ST DEV	6.31084	8.07194
	AVERAGE	22.3	69.5429
	P VALUE	0.0006

## Sheet: Figure 5D
				% of Tregs in Puro- and Puro+ CD4+ cells
		SPLEEN			TUMOR
		%of Puro-	% of Puro+		%of Puro-	% of Puro+
		8.67	6.78		22.2	29.9
		5.88	5.84		16.2	24.7
		5.68	5.84		28.9	36.6
		9.04	5.09		13	20.3
		6.41	5.39		33.1	41
		5.93	4.06		23.9	29.2
		6.84	5.15		19.6	25.1
		7.41	5.07		23.9	40.3
		5.84	4.81		27.7	31.5
		6.88	4.25		11.4	20.1
		5.22	4.71		27	41.5
		5.6	3.82		8.48	14.4
					18.4	24.9
					19.5	35.6
					22.7	37.3
					34.9	54.4
					16	35.1
					16.6	32.7
	ST DEV	1.2195	0.835095		7.25048	9.59832
	AVERAGE	6.61667	5.0675		21.3044	31.9222
	P VALUE	0.0005			0.0005
