# Supplementary material for: mTOR-dependent translation drives tumor infiltrating CD8+ effector and CD4+ Treg cells expansion
Source: eLife. 2021 Nov 17;10:e69015. doi: 10.7554/eLife.69015 (PMC8598161; doi:10.7554/eLife.69015)
Supplement: Figure 6—source data 1. [file elife-69015-fig6-data1.xlsx]

## Sheet: Figure 6A
		% of CTLA-4 in Puro- and Puro+ Tregs in tumor
			Puro-	Puro+
			21.5	33.3
			12.7	29.7
			9.43	37.1
			18.4	21.4
			18.1	29.8
			6.45	15.4
			6.74	5.66
			8.43	24.5
			3.66	8.93
		ST DEV	6.28033	10.9378
		AVERAGE	11.7122	22.8656
		P VALUE	0.04

## Sheet: Figure 6B
		% of TGF-β in Puro- and Puro+ Tregs in tumor
			Puro-	Puro+
			21.5	33.3
			12.7	29.7
			9.43	37.1
			18.4	21.4
			18.1	29.8
			6.45	15.4
			6.74	5.66
			8.43	24.5
			3.66	8.93
		ST DEV	6.28033	10.9378
		AVERAGE	11.7122	22.8656
		P VALUE	0.0087

## Sheet: Figure 6C
		% of Ki-67 in Puro- and Puro+ Tregs in tumor
			Puro-	Puro+
			39.2	74.3
			54.6	71.7
			48.8	73.2
			55.4	86.5
			60.8	78.4
			59.7	78.6
		ST DEV	8.02606	5.37603
		AVERAGE	53.0833	77.1167
		P VALUE	0.0022

## Sheet: Figure 6D
		% of Ki-67 in Puro+ Tregs or Puro+ Tconv in tumor
			Puro+ Treg	Puro+ Tconv
			18.3	71.3
			28.2	68.8
			29.4	70.3
			42.1	84.1
			30.3	76.1
			14.7	74.9
		ST DEV	9.72536	5.56552
		AVERAGE	27.1667	74.25
		P VALUE	0.0022
